# Supplementary material for: Human placental exosomes induce maternal systemic immune tolerance by reprogramming circulating monocytes
Source: PubMed Central journal article supplement (PMC8857816; doi:10.1186/s12951-022-01283-2), 2022-02-18

**Additional file 1: Table S1. Antibodies used for flow cytometry**

| Antibodies                                            | Identifier | Resource  | Volume / reaction |
|-------------------------------------------------------|------------|-----------|-------------------|
| Pacific Blue™ anti-human CD4 Antibody                 | 317429     | Biolegend | 1 µl              |
| PE anti-human CD223 (LAG-3) Antibody                  | 369305     | Biolegend | 5µl               |
| APC anti-human CD152 (CTLA-4) Antibody                | 349908     | Biolegend | 5µl               |
| FITC anti-human CD73 (Ecto-5'-nucleotidase) Antibody  | 344016     | Biolegend | 5µl               |
| APC/Cyanine7 anti-human CD11c Antibody                | 337217     | Biolegend | 5µl               |
| PE anti-human CD56 (NCAM) Antibody                    | 318305     | Biolegend | 5µl               |
| Alexa Fluor® 700 anti-human CD19 Antibody             | 302225     | Biolegend | 5µl               |
| Brilliant Violet 605™ anti-human CD3 Antibody         | 317321     | Biolegend | 5µl               |
| APC anti-human HLA-DR, DP, DQ Antibody                | 361713     | Biolegend | 5µl               |
| APC/Cyanine7 anti-human CD273 (B7-DC, PD-L2) Antibody | 345515     | Biolegend | 5µl               |
| Pacific Blue™ anti-human CD14 Antibody                | 367121     | Biolegend | 2µl               |
| Human TruStain FcX™ (Fc Receptor Blocking Solution)   | 422302     | Biolegend | 5µl               |
| PE anti-human CD8                                     | 344706     | Biolegend | 5µl               |
| FITC anti-human FOXP3                                 | 320106     | Biolegend | 5µl               |
| PE anti-human CD25                                    | 302606     | Biolegend | 5µl               |

**Additional file 1: Table S2.** Primers used for RT-qPCR

| Primers | Resource          | Identifier    |
|---------|-------------------|---------------|
| CD163   | Thermo Scientific | Hs00174705_m1 |
| CD206   | Thermo Scientific | Hs00267207_m1 |
| CD209   | Thermo Scientific | Hs01588349_m1 |
| CD274   | Thermo Scientific | Hs00204257_m1 |
| CCL2    | Thermo Scientific | Hs00234140_m1 |
| CCL8    | Thermo Scientific | Hs04187715_m1 |
| IL10    | Thermo Scientific | Hs00961622_m1 |
| IDO1    | Thermo Scientific | Hs00961622_m1 |
| HLA-DRA | Thermo Scientific | Hs00984148_m1 |
| 18s     | Thermo Scientific | 4319413E      |

**Additional File 1 Supplementary Fig. S1. Flow cytometry gating strategy of different immune cell populations. Immunophenotyping using the classical immune cell surface markers. CD3 for T cells, CD14 for monocytes, CD19 for B cells, CD56 for NK cells, and CD11c for dendritic cells.**

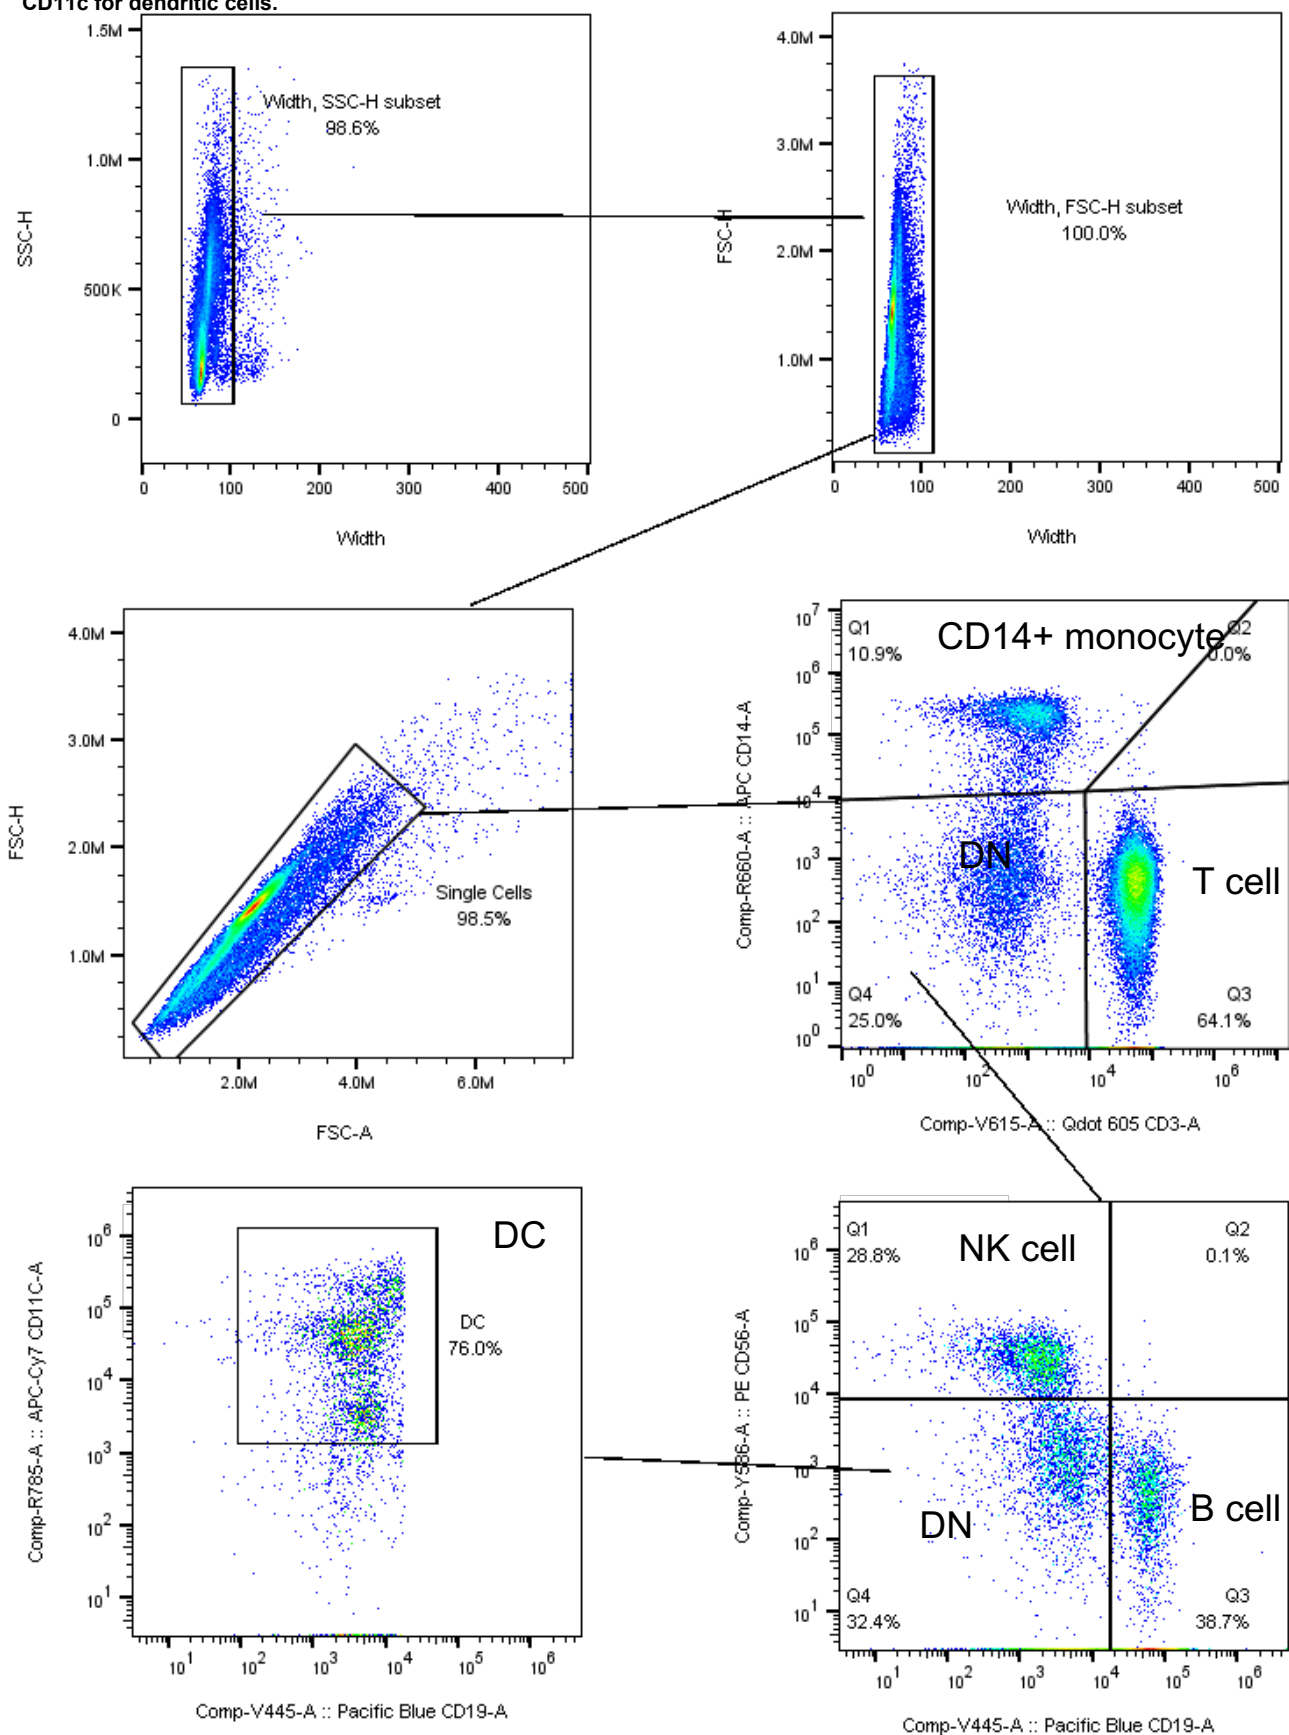

Additional File 1 Supplementary Fig. S2. Functional categories of pEXO-educated monocytes. (A-D) Heatmaps of genes that have significant changes in pEXO-educated monocytes compared with untreated controls were clustered according to the corresponding functional categories.

**A** Regulation of immune response

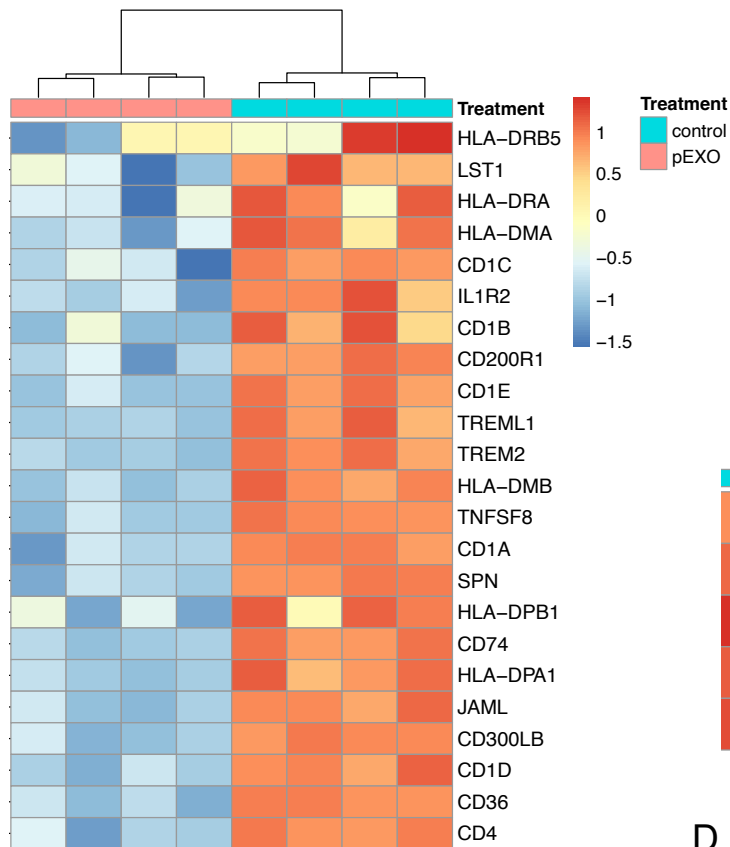

**B** Antigen processing and presentation of peptide  
Or polysaccharide antigen via MHC class II

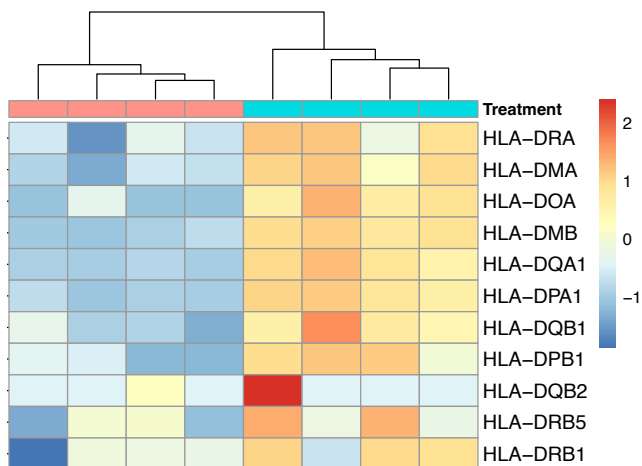

**C** Antigen processing and presentation,  
Exogenous lipid antigen via MHC class Ib

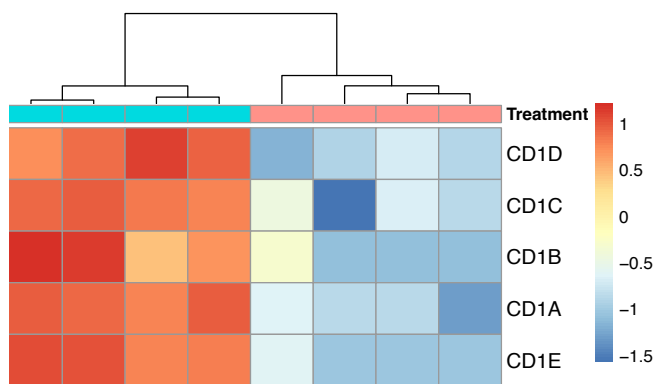

**D** T cell proliferation and co-stimulation

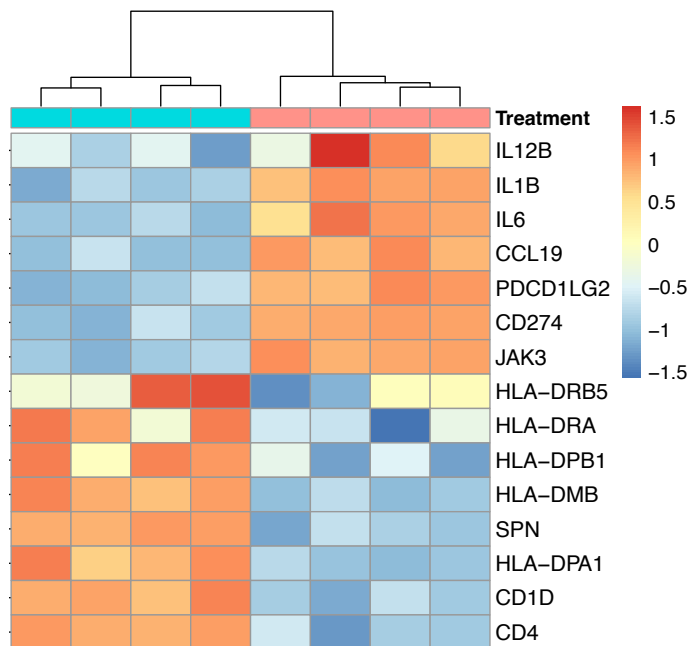

**Additional File 1 Supplementary Fig.S3. Autologous monocytes do not influence T cell proliferation.** CD14<sup>+</sup> monocyte with or without pEXO (20 µg/ml) treatment were allowed to co-culture with the CD4<sup>+</sup>/CD8<sup>+</sup> T cells isolated by MACS from the same donor at a ratio(1:1) for 4 days. CFSE dye was then used for tracking cell division according to the manufacturer's protocol. Representative histogram of CFSE-labelled human T cells were shown. The percentage of CFSE-labelled human T cells were presented as mean±SD (N=4). \*\*P<0.05 when compared to the control T cells without monocyte coculture.

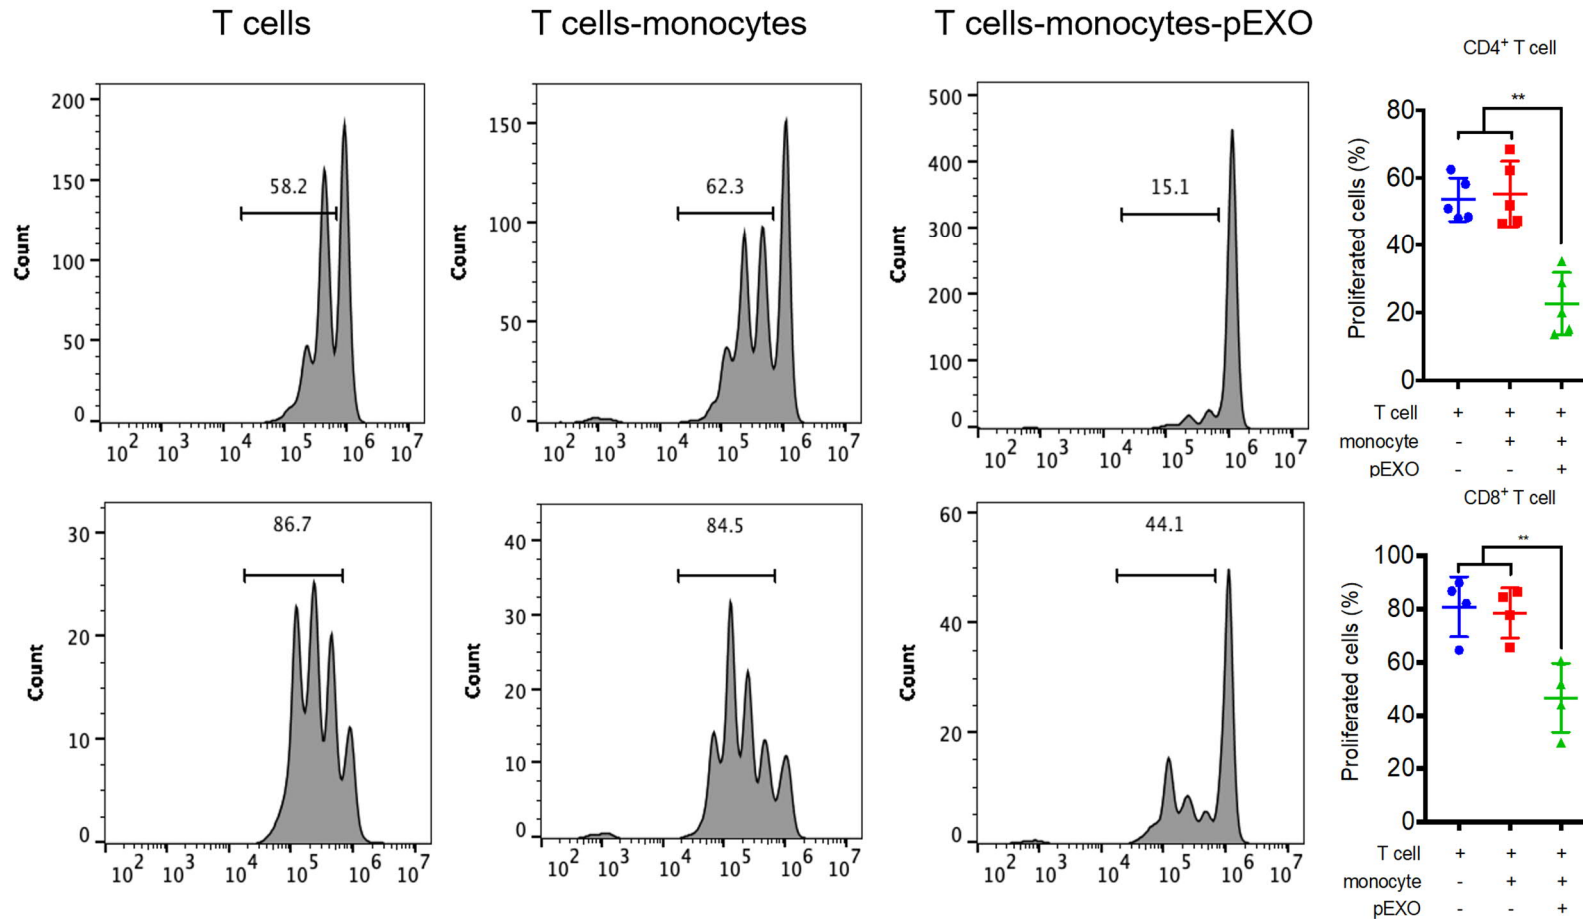

**Additional File 1 Supplementary Fig. S4. pEXO did not affect the viabilities of human monocytes and T-cells.** (A) Effect of pEXO on viability of monocytes by XTT assay. Monocytes were incubated with 0-50  $\mu\text{g/ml}$  of pEXOs for 24 hours. XTT signals were analyzed by the ELISA spectrophotometer at 450 nm. Representative flow cytometry plots were also shown. (B) Viable, necrotic and apoptotic T cells after 20  $\mu\text{g}$  pEXO treatment for 24 hours were quantified by bivariate Yo-Pro-1/PI flow cytometry. Representative flow cytometry plots and the data of viable, necrotic and apoptotic T-cells were shown. All the values were presented as mean $\pm$ SD (N=3). No significant difference was detected when compared to the control group.

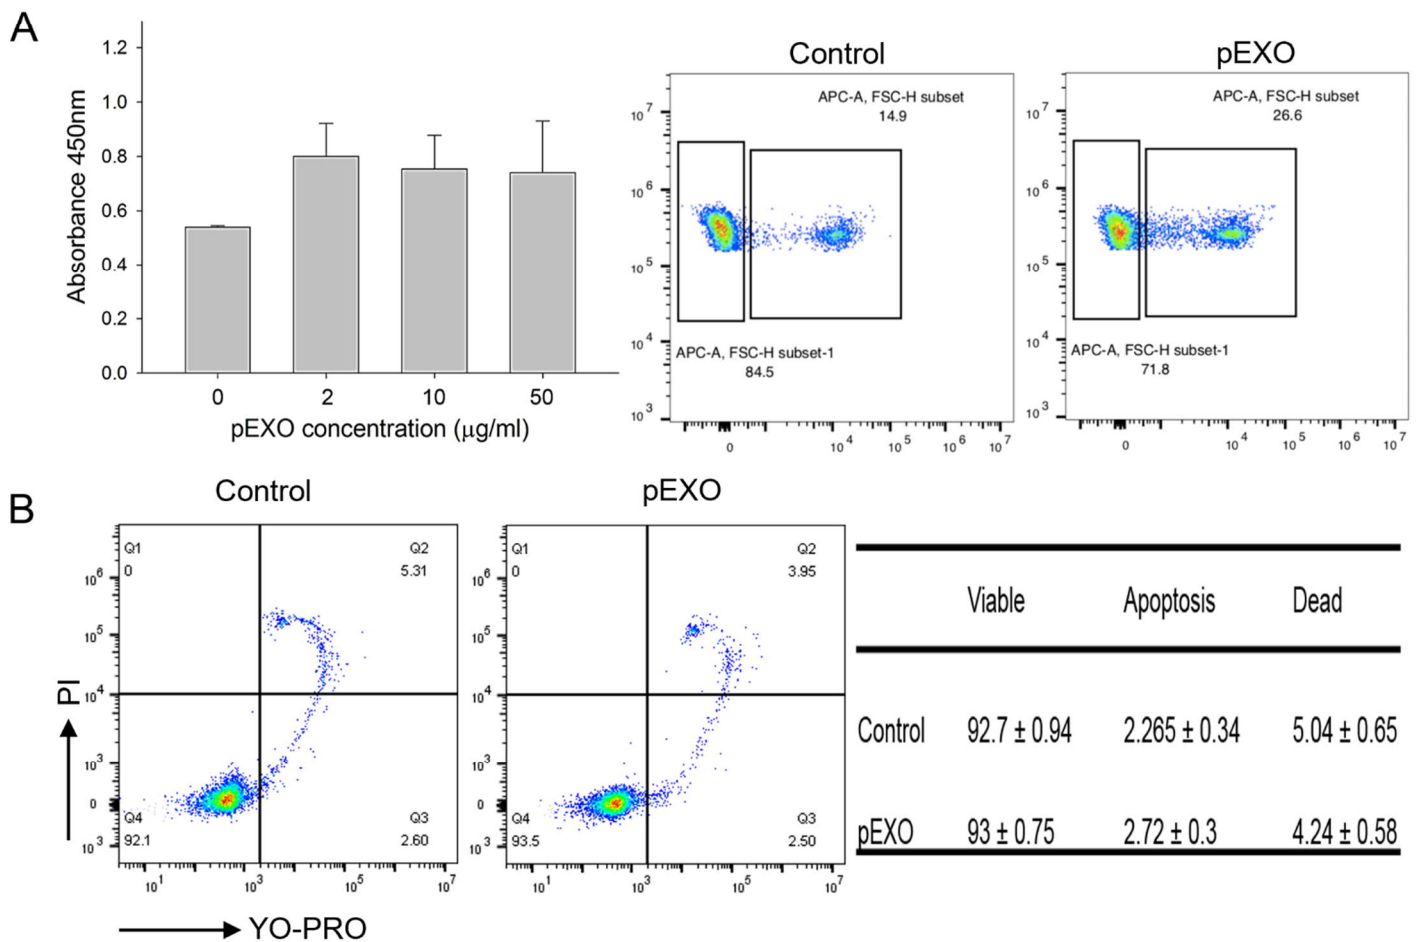

**Additional File 1 Supplementary Fig. S5. Non-coding RNA-seq of pEXO.** (A) Reads distribution of small RNAs in pEXOs. (B) TOP 20 enriched GO terms of miRNA target genes. (C) The target genes of miRNAs in PEXOs were analyzed for KEGG pathway enrichment. (D) The transfection efficacies of miRNA mimics were examined by flow cytometry. Values were presented as mean±SD; \*\*\*\*p<0.001 when compared to the control group.

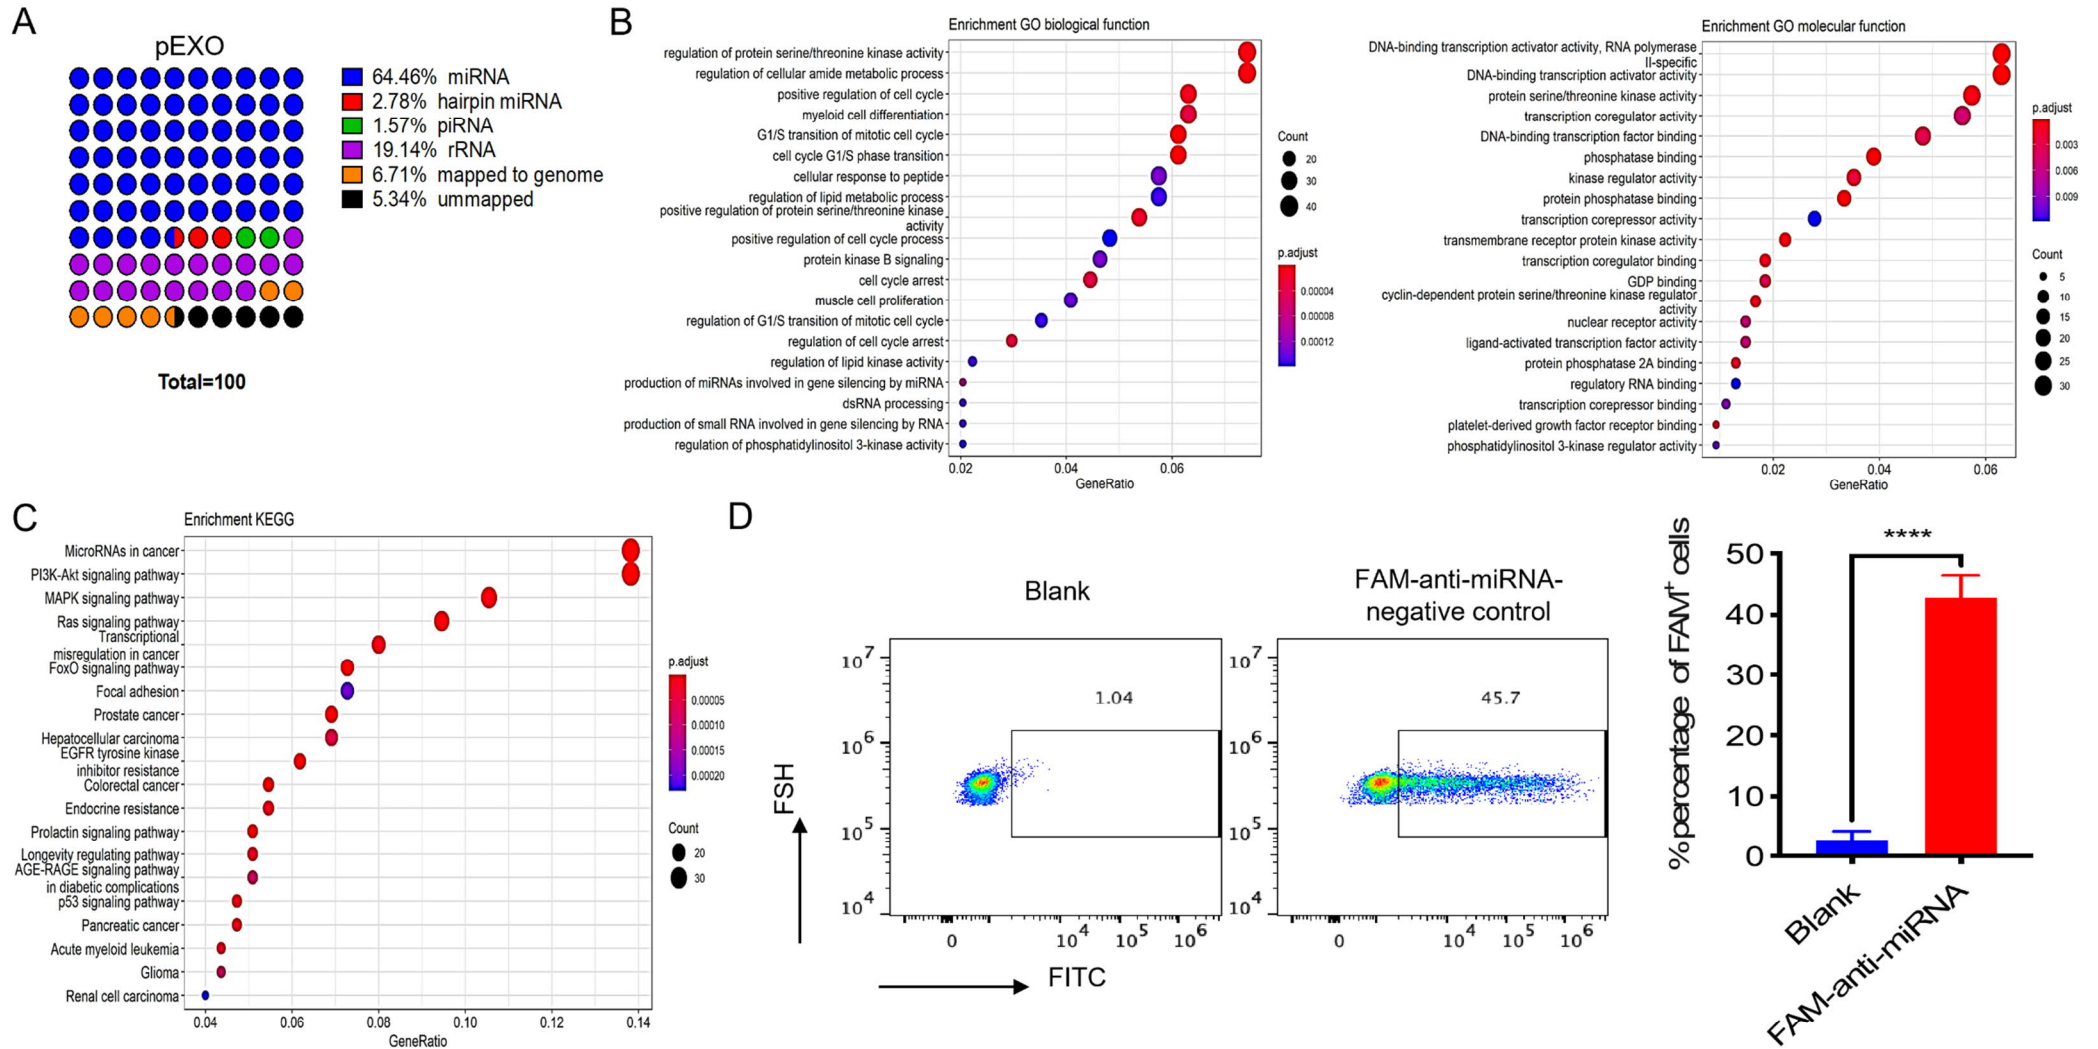

Supplement: 12951_2022_1283_MOESM1_ESM.pdf [file 12951_2022_1283_MOESM1_ESM.pdf]
